# Supplementary material
Source: ML conference proceedings conference paper supplement (https://openreview.net/forum?id=v8u3EFAyW9)
Supplement: supplementary_material [file attachment]

## Sheet: Sheet1
hyperparameter	Timestep	QRDQN	QRDQN	QRDQN	QRDQN	QRDQN	QRDQN	QRDQN	QRDQN	QRDQN	QRDQN	QRDQN	QRDQN	QRDQN	QRDQN	QRDQN	QRDQN	QRDQN	DLTV	DLTV	DLTV	DLTV	DLTV	DLTV	DLTV	DLTV	DLTV	DLTV	DLTV	DLTV	DLTV	DLTV	DLTV	DLTV	DLTV	p-DLTV	p-DLTV	p-DLTV	p-DLTV	p-DLTV	p-DLTV	p-DLTV	p-DLTV	p-DLTV	p-DLTV	p-DLTV	p-DLTV	p-DLTV	p-DLTV
		mean	mean	mean	mean	mean	std	std	std	std	std	error	error	error	error	error	error	error	mean	mean	mean	mean	mean	std	std	std	std	std	error	error	error	error	error	error	error	mean	mean	mean	mean	mean	std	std	std	std	std	error	error	error	error
		1	2	3	4	5	1	2	3	4	5	1	2	3	4	5	mean	std	1	2	3	4	5	1	2	3	4	5	1	2	3	4	5	mean	std	1	2	3	4	5	1	2	3	4	5	1	2	3	4
1	steps = 5000	5.8	6.11	6.11	6.02	5.98	1.88	1.73	1.8	1.38	1.61	2.92	2.58443	2.62965	2.45231	2.61386	2.64005	0.0293769	5.92	6.03	6.4	8.11	5.82	1.86	1.84	1.33	0.46	1.97	2.81376	2.71643	2.1095	0.379132	2.96086	2.19594	1.1365	6.06	6.1	6.26	8.03	6.05	1.99	1.94	1.44	0.37	1.93	2.7939	2.73055	2.28746	0.297357
1	10000	7.65	7.98	7.17	8.18	8.07	1.85	0.19	1.21	0.08	0.08	1.82534	0.162114	1.46272	0.0800062	0.0300167	0.712039	0.742498	8.12	7.96	8.06	8.01	7.19	0.26	0.16	0.07	0.03	1.38	0.180114	0.160751	0.0414849	0.103446	1.58603	0.414366	0.431928	8.03	7.93	8.2	7.95	7.92	0.42	0.3	0.12	0.53	0.19	0.346152	0.277238	0.107336	0.473393
1	15000	9.03	8.15	8.03	8.13	8.01	0.25	0.06	0.08	0.08	0.06	0.945231	0.054231	0.0700071	0.0300167	0.0924175	0.238381	0.156655	7.98	8.23	8.01	8.06	8.07	0.08	0.08	0.08	0.03	0.05	0.120004	0.130004	0.0900056	0.0648151	0.0431393	0.0895936	0.00133248	8.02	8	8	8.26	8.01	0.09	0.08	0.07	0.07	0.07	0.0805047	0.100005	0.100603	0.160378
1	20000	9.33	8.07	8.14	8.15	8.18	0.09	0.03	0.07	0.04	0.07	1.23003	0.0591692	0.0414849	0.0646607	0.0807527	0.29522	0.273283	7.94	8.11	8.16	8.08	8.18	0.06	0.05	0.04	0.04	0.04	0.161372	0.032573	0.0726705	0.045618	0.0898944	0.0804256	0.0025509	8.08	8.11	8.17	8.13	8.05	0.06	0.04	0.08	0.09	0.05	0.029	0.0422019	0.0700071	0.0313209
5	5000	5.8	6.11	6.11	6.02	5.98	1.88	1.73	1.8	1.38	1.61	2.92	2.58443	2.62965	2.45231	2.61386	2.64005	0.0293769	5.97	6.33	6.08	8.11	8.15	1.77	2.06	1.91	0.34	0.31	2.71839	2.65506	2.725	0.259193	0.234395	1.71841	1.80553	7.88	5.88	8.08	8.11	5.96	0.49	1.66	0.35	0.54	1.71	0.464415	2.72427	0.269742	0.459109
5	10000	7.65	7.98	7.17	8.18	8.07	1.85	0.19	1.21	0.08	0.08	1.82534	0.162114	1.46272	0.0800062	0.0300167	0.712039	0.742498	8.1	7.85	8.05	8.06	8.08	0.11	0.48	0.25	0.05	0.03	0.029	0.470851	0.176241	0.0506063	0.0547814	0.156296	0.0342557	8.05	8.18	8.18	8.1	7.99	0.08	0.06	0.05	0.08	0.36	0.05001	0.0827103	0.0857963	0.001
5	15000	9.03	8.15	8.03	8.13	8.01	0.25	0.06	0.08	0.08	0.06	0.945231	0.054231	0.0700071	0.0300167	0.0924175	0.238381	0.156655	8.07	8.1	8	8.13	8.19	0.07	0.08	0.06	0.04	0.08	0.0319531	0.001	0.102181	0.0508035	0.0900056	0.0551887	0.00172901	8.11	8.13	8.05	8.11	8.05	0.05	0.07	0.05	0.06	0.05	0.032573	0.0319531	0.0588303	0.0232594
5	20000	9.33	8.07	8.14	8.15	8.18	0.09	0.03	0.07	0.04	0.07	1.23003	0.0591692	0.0414849	0.0646607	0.0807527	0.29522	0.273283	8.09	8.1	8.11	8.09	8.05	0.08	0.07	0.05	0.04	0.07	0.0100499	0.011	0.032573	0.0422019	0.0511957	0.0294041	0.000340499	8.11	8.16	8.08	8.15	8.09	0.03	0.05	0.03	0.03	0.1	0.0519711	0.0675352	0.0547814	0.0714213
10	5000	5.8	6.11	6.11	6.02	5.98	1.88	1.73	1.8	1.38	1.61	2.92	2.58443	2.62965	2.45231	2.61386	2.64005	0.0293769	6.04	6.18	8.16	8.08	8	1.96	1.81	0.07	0.07	0.06	2.78823	2.58376	0.061	0.0228254	0.102181	1.1116	2.07162	7.74	7.78	7.68	7.59	5.65	0.85	0.64	0.64	0.64	1.91	0.849094	0.644113	0.6992	0.756691
10	10000	7.65	7.98	7.17	8.18	8.07	1.85	0.19	1.21	0.08	0.08	1.82534	0.162114	1.46272	0.0800062	0.0300167	0.712039	0.742498	6.84	7.05	8.17	8.05	8	1.28	1.22	0.07	0.07	0.06	1.73931	1.54914	0.070859	0.0511957	0.102181	0.702536	0.74383	8.08	7.76	7.63	7.56	7.3	0.08	0.64	0.64	0.63	0.74	0.020025	0.654279	0.730329	0.770066
10	15000	9.03	8.15	8.03	8.13	8.01	0.25	0.06	0.08	0.08	0.06	0.945231	0.054231	0.0700071	0.0300167	0.0924175	0.238381	0.156655	8.32	8.07	8.13	8.04	7.99	0.09	0.08	0.07	0.08	0.06	0.220184	0.0300167	0.0319531	0.0600083	0.111987	0.0908297	0.0063237	8.03	7.76	7.61	7.52	7.44	0.07	0.64	0.64	0.63	0.75	0.070859	0.654279	0.743358	0.798624
10	20000	9.33	8.07	8.14	8.15	8.18	0.09	0.03	0.07	0.04	0.07	1.23003	0.0591692	0.0414849	0.0646607	0.0807527	0.29522	0.273283	8.14	8.12	8.13	8.04	7.99	0.05	0.08	0.07	0.08	0.06	0.0506063	0.020025	0.0319531	0.0600083	0.111987	0.0549159	0.00126156	8.15	7.73	7.59	7.51	7.74	0.05	0.64	0.64	0.63	0.64	0.0588303	0.670359	0.756691	0.805916
50	5000	5.8	6.11	6.11	6.02	5.98	1.88	1.73	1.8	1.38	1.61	2.92	2.58443	2.62965	2.45231	2.61386	2.64005	0.0293769	6.2	5.74	7.99	8.04	7.96	1.79	1.87	0.05	0.05	0.06	2.55552	2.96144	0.114285	0.0675352	0.141566	1.16807	2.12913	6.11	5.21	7.9	7.9	7.92	1.94	1.92	0.58	0.57	0.55	2.72323	3.4255	0.537588	0.528319
50	10000	7.65	7.98	7.17	8.18	8.07	1.85	0.19	1.21	0.08	0.08	1.82534	0.162114	1.46272	0.0800062	0.0300167	0.712039	0.742498	5.58	8.02	7.99	8.04	7.96	2.03	0.25	0.05	0.05	0.06	3.18575	0.186979	0.114285	0.0675352	0.141566	0.739223	1.87234	7.78	7.45	7.9	7.9	7.93	0.92	0.9	0.58	0.56	0.54	0.897954	1.04559	0.537588	0.519077
50	15000	9.03	8.15	8.03	8.13	8.01	0.25	0.06	0.08	0.08	0.06	0.945231	0.054231	0.0700071	0.0300167	0.0924175	0.238381	0.156655	5.16	8.14	8.01	8.07	7.93	1.54	0.06	0.05	0.04	0.05	3.28212	0.0451774	0.0951893	0.0508035	0.172803	0.729218	2.03926	7.65	7.11	7.9	7.9	7.93	0.54	1.09	0.58	0.56	0.54	0.642792	1.41357	0.537588	0.519077
50	20000	9.33	8.07	8.14	8.15	8.18	0.09	0.03	0.07	0.04	0.07	1.23003	0.0591692	0.0414849	0.0646607	0.0807527	0.29522	0.273283	7.08	7.98	8.02	8.07	7.95	1.09	0.05	0.05	0.04	0.05	1.43474	0.12394	0.0857963	0.0508035	0.15317	0.36969	0.355973	7.84	7.92	7.9	7.91	7.93	0.4	0.59	0.57	0.55	0.53	0.411535	0.53989	0.528319	0.506025
100	5000	5.8	6.11	6.11	6.02	5.98	1.88	1.73	1.8	1.38	1.61	2.92	2.58443	2.62965	2.45231	2.61386	2.64005	0.0293769	3.04	9.1	8.29	8.33	8.4	1	5.5	0.38	0.36	0.36	5.14278	5.5105	0.354261	0.361581	0.409684	2.35576	7.37245	6.57	6.86	7.61	7.64	7.61	1.83	1.41	0.75	0.75	0.72	2.32377	1.81765	0.829253	0.811887
100	10000	7.65	7.98	7.17	8.18	8.07	1.85	0.19	1.21	0.08	0.08	1.82534	0.162114	1.46272	0.0800062	0.0300167	0.712039	0.742498	6.59	7.54	8.29	8.36	8.39	1.25	0.38	0.37	0.36	0.36	1.90962	0.634824	0.345863	0.381367	0.402419	0.734819	0.444217	6.85	6.83	7.63	7.63	7.63	0.99	0.91	0.75	0.75	0.72	1.54557	1.51662	0.817595	0.817595
100	15000	9.03	8.15	8.03	8.13	8.01	0.25	0.06	0.08	0.08	0.06	0.945231	0.054231	0.0700071	0.0300167	0.0924175	0.238381	0.156655	7.06	8.09	8.29	8.36	8.39	0.49	0.1	0.37	0.36	0.36	1.11753	0.0214709	0.345863	0.381367	0.402419	0.453731	0.161747	7.16	7.58	7.66	7.62	7.64	0.82	1.03	0.75	0.75	0.71	1.19571	1.08213	0.800725	0.823384
100	20000	9.33	8.07	8.14	8.15	8.18	0.09	0.03	0.07	0.04	0.07	1.23003	0.0591692	0.0414849	0.0646607	0.0807527	0.29522	0.273283	7.87	8.31	8.31	8.39	8.35	0.21	0.38	0.37	0.36	0.36	0.263706	0.365378	0.357241	0.402419	0.374621	0.352673	0.00276343	7.36	7.58	7.66	7.62	7.64	0.79	0.75	0.75	0.75	0.71	1.02483	0.847326	0.800725	0.823384
500	5000	5.8	6.11	6.11	6.02	5.98	1.88	1.73	1.8	1.38	1.61	2.92	2.58443	2.62965	2.45231	2.61386	2.64005	0.0293769	0.05	0.02	0.25	0.23	0.22	0.24	0.19	0.09	0.09	0.09	8.05157	8.08074	7.85001	7.87001	7.88001	7.94646	0.0121608	5.32	5.97	6	5.47	6.22	1.74	1.28	1.47	1.25	1.37	3.23739	2.44428	2.5178	2.8781
500	10000	7.65	7.98	7.17	8.18	8.07	1.85	0.19	1.21	0.08	0.08	1.82534	0.162114	1.46272	0.0800062	0.0300167	0.712039	0.742498	0.59	2.27	0.25	0.21	0.24	0.3	1.04	0.1	0.08	0.08	7.51319	5.90835	7.85002	7.89	7.86	7.40431	0.722991	6.63	6.01	6.04	5.56	6.1	0.81	1.27	1.46	1.33	1.34	1.64084	2.40454	2.47896	2.83048
500	15000	9.03	8.15	8.03	8.13	8.01	0.25	0.06	0.08	0.08	0.06	0.945231	0.054231	0.0700071	0.0300167	0.0924175	0.238381	0.156655	1.28	0.05	0.23	0.23	0.23	0.44	0.04	0.11	0.09	0.09	6.82944	8.0501	7.87005	7.87001	7.87001	7.69792	0.241786	6.94	6.16	5.8	5.77	6.04	0.86	1.23	1.36	1.36	1.33	1.3973	2.25473	2.6317	2.65796
500	20000	9.33	8.07	8.14	8.15	8.18	0.09	0.03	0.07	0.04	0.07	1.23003	0.0591692	0.0414849	0.0646607	0.0807527	0.29522	0.273283	0.92	0.24	0.23	0.22	0.16	0.24	0.1	0.11	0.09	0.1	7.18176	7.86002	7.87005	7.88001	7.94002	7.74637	0.10059	7.03	6.12	5.52	5.8	6.06	0.82	1.26	1.25	1.33	1.32	1.30039	2.30444	2.83248	2.61725
1000	5000	5.8	6.11	6.11	6.02	5.98	1.88	1.73	1.8	1.38	1.61	2.92	2.58443	2.62965	2.45231	2.61386	2.64005	0.0293769	0.03	0.05	0.43	0.4	0.38	0.24	0.3	0.2	0.18	0.16	8.07157	8.05298	7.67092	7.70064	7.7204	7.8433	0.0403101	5.05	4.93	6.23	6.15	6.11	1.51	1.8	1.29	1.25	1.23	3.36817	3.60609	2.22679	2.27356
1000	10000	7.65	7.98	7.17	8.18	8.07	1.85	0.19	1.21	0.08	0.08	1.82534	0.162114	1.46272	0.0800062	0.0300167	0.712039	0.742498	0.05	0.01	0.42	0.37	0.4	0.07	0.07	0.19	0.17	0.16	8.05001	8.09001	7.68077	7.73051	7.70041	7.85034	0.0407249	3.8	4.75	6.07	6.01	6.22	1.28	1.56	1.25	1.2	1.28	4.46403	3.66196	2.34253	2.37071
1000	15000	9.03	8.15	8.03	8.13	8.01	0.25	0.06	0.08	0.08	0.06	0.945231	0.054231	0.0700071	0.0300167	0.0924175	0.238381	0.156655	0.05	0.13	0.41	0.39	0.36	0.04	0.08	0.18	0.16	0.16	8.0501	7.97	7.69064	7.7104	7.7404	7.83231	0.027443	4.58	4	6.06	5.99	6.27	1.42	1.4	1.24	1.2	1.31	3.76608	4.30694	2.34625	2.38836
1000	20000	9.33	8.07	8.14	8.15	8.18	0.09	0.03	0.07	0.04	0.07	1.23003	0.0591692	0.0414849	0.0646607	0.0807527	0.29522	0.273283	0.02	0.42	0.42	0.38	0.37	0.04	0.2	0.18	0.16	0.15	8.0801	7.68092	7.68064	7.7204	7.73031	7.77848	0.0289403	4.22	6.35	6.18	6.03	5.78	1.29	1.32	1.27	1.21	1.27	4.064	2.14421	2.25834	2.35787
5000	5000	5.8	6.11	6.11	6.02	5.98	1.88	1.73	1.8	1.38	1.61	2.92	2.58443	2.62965	2.45231	2.61386	2.64005	0.0293769	0.04	-0.05	0.03	0.02	0.01	0.26	0.38	0.04	0.03	0.03	8.06199	8.15548	8.0701	8.08016	8.09016	8.09158	0.00138823	6.05	4.48	6.55	6.47	6.22	1.58	1.98	1.51	1.57	1.6	2.53959	4.08786	2.10821	2.20772
5000	10000	7.65	7.98	7.17	8.18	8.07	1.85	0.19	1.21	0.08	0.08	1.82534	0.162114	1.46272	0.0800062	0.0300167	0.712039	0.742498	-0.01	-0.03	0.01	0.02	0.01	0.04	0.05	0.03	0.03	0.03	8.1101	8.13006	8.09016	8.08016	8.09016	8.10013	0.00039819	5.91	5.62	6.51	5.83	6.17	1.6	1.36	1.5	1.55	1.58	2.66523	2.79038	2.13112	2.70386
5000	15000	9.03	8.15	8.03	8.13	8.01	0.25	0.06	0.08	0.08	0.06	0.945231	0.054231	0.0700071	0.0300167	0.0924175	0.238381	0.156655	0.01	0.03	0.03	0.01	0.03	0.03	0.04	0.04	0.03	0.03	8.09016	8.0701	8.0701	8.09016	8.07016	8.07814	0.000120452	5.94	5.44	6.73	6.07	6.17	1.6	1.42	1.53	1.6	1.58	2.64064	2.97801	1.99412	2.5354
5000	20000	9.33	8.07	8.14	8.15	8.18	0.09	0.03	0.07	0.04	0.07	1.23003	0.0591692	0.0414849	0.0646607	0.0807527	0.29522	0.273283	0.01	0	0	0.01	0.01	0.02	0.04	0.03	0.03	0.03	8.09023	8.1001	8.10016	8.09016	8.09016	8.09416	2.9692e-05	6.19	6.66	6.7	6.17	6.07	1.54	1.61	1.58	1.61	1.57	2.40349	2.10034	2.0511	2.46226
[truncated: 26 more columns]
